# Supplementary material
Source: publisher figshare collection journal article supplement (https://asha.figshare.com/articles/dataset/_/20416056)
Supplement: Supplementary file 1 [file 1]

Supplemental Material S1. SCORED DISCOURSE SAMPLE FROM A PARTICIPANT WITH PD

| GC score | Prompt-Please tell me about a person who had an important impact on your life.                                                                                                                                                                                                                                                         |
|----------|----------------------------------------------------------------------------------------------------------------------------------------------------------------------------------------------------------------------------------------------------------------------------------------------------------------------------------------|
|          | -:02                                                                                                                                                                                                                                                                                                                                   |
| 4        | C A person who had an important impact on my life and who I could talk about is XXX_YYY.                                                                                                                                                                                                                                               |
| 4        | C Dr_YYY was a psychology professor from University_of_QQQ.                                                                                                                                                                                                                                                                            |
| 4        | C And when I knew him he was chairman of the psychology department and also my (:02) leader in the research lab.                                                                                                                                                                                                                       |
| 4        | C And we did research on sleep (:02) (um) and animal research and also human research (:02) on (:02) sleep deprivation of animals.                                                                                                                                                                                                     |
| 1        | C (Uh) the animal was the rat.                                                                                                                                                                                                                                                                                                         |
| 2        | C And (we) the rat would walk on a treadmill, the water treadmill, that we developed.                                                                                                                                                                                                                                                  |
| 2        | C We would keep it on the water treadmill till deprived of sleep.                                                                                                                                                                                                                                                                      |
| 2        | C We also did similar experiments using drugs to induce sleep deprivation.                                                                                                                                                                                                                                                             |
| 2        | C In this case it was dextroamphetamine.                                                                                                                                                                                                                                                                                               |
| 2        | C And we would keep animals awake with doses of dextroamphetamine for twenty four, forty eight, or seventy two hours.                                                                                                                                                                                                                  |
| 2        | C And after that period we would withdraw the dextroamphetamine (:02) and (:02) record the animals sleep waking cycle by using an EEG (:03) and timing the animal as to whether the longer we kept them awake in the first part of the study would result in them (:02) staying up more (in the last) in the second part of the study. |
| 2        | C In fact we found that animals would compensate for the sleep deprivation (:02) and not stay awake longer with longer periods of deprivation.                                                                                                                                                                                         |
|          | ; :02                                                                                                                                                                                                                                                                                                                                  |
| 4        | C Dr_YYY had other impacts on my life than the research laboratory.                                                                                                                                                                                                                                                                    |
| 4        | C He was chairman of the department.                                                                                                                                                                                                                                                                                                   |
| 4        | C I took courses from him in learning and memory.                                                                                                                                                                                                                                                                                      |
|          | ; :02                                                                                                                                                                                                                                                                                                                                  |
| 3        | C And one year he took his sabbatical leave in Great Britain.                                                                                                                                                                                                                                                                          |

|    |                                                                                                              |
|----|--------------------------------------------------------------------------------------------------------------|
| 4  | C And I ran his lab and supervised the research program and received funds for doing the research.           |
|    | ; :02                                                                                                        |
| 2  | C And (uh) it was very interesting, a lot of fun and actually (uh) resulted in a paper published in Science. |
|    | ; :04                                                                                                        |
| NR | <del>C Keep going?</del>                                                                                     |
|    | <del>E XXX.</del>                                                                                            |
| NR | <del>C Alright.</del>                                                                                        |
|    | ; :02                                                                                                        |
| 4  | C Throughout my professional career, this one individual kept showing up.                                    |
| 3  | C And (:02) he remained at the University_of_QQQ.                                                            |
|    | -3:00                                                                                                        |
