# Supplementary material
Source: publisher figshare collection journal article supplement (https://asha.figshare.com/articles/dataset/_/20416056)
Supplement: Supplementary file 2 [file 1]

Supplemental Material S2. FACTOR LOADINGS FROM THE PRINCIPAL COMPONENTS ANALYSIS OF COGNITIVE TEST SCORES.

**Rotated Component Matrix<sup>a</sup>**

|                                                     | Speed        | Component   |              |             |
|-----------------------------------------------------|--------------|-------------|--------------|-------------|
|                                                     |              | WM          | Inhibition   | Updating    |
| <b>Digit span forward</b>                           | -.012        | <b>.897</b> | -.052        | -.085       |
| <b>Digit span backward</b>                          | -.112        | <b>.776</b> | .069         | .061        |
| <b>Visual Memory Accuracy</b>                       | <b>-.667</b> | .216        | .208         | .168        |
| <b>Operation Span - in sequence</b>                 | -.378        | <b>.691</b> | .224         | .009        |
| <b>Stroop Colors RT</b>                             | <b>.809</b>  | -.207       | .379         | .002        |
| <b>Stroop Interference (Colors-Color Words RTs)</b> | .157         | .079        | <b>-.867</b> | .108        |
| <b>0-Back accuracy</b>                              | .200         | .363        | .038         | <b>.491</b> |
| <b>1-Back accuracy</b>                              | -.137        | .311        | <b>.689</b>  | .187        |
| <b>2-Back accuracy</b>                              | -.155        | -.180       | -.004        | <b>.858</b> |
| <b>Digit Symbol Substitution RTs</b>                | <b>.790</b>  | -.166       | -.364        | .085        |
| <b>Star task RTs</b>                                | <b>.852</b>  | .115        | -.197        | .036        |

Extraction Method: Principal Component Analysis.

Rotation Method: Varimax with Kaiser Normalization.

a. Rotation converged in 4 iterations.
