# Supplementary material
Source: publisher figshare collection journal article supplement (https://asha.figshare.com/articles/dataset/_/20416056)
Supplement: Supplementary file 3 [file 1]

Supplemental Material S3. RESULTS OF THE BEST MODEL FROM THE LINEAR MIXED MODEL ANALYSIS

| Source                       | Numerator df | Denominator df | F       | Sig. |
|------------------------------|--------------|----------------|---------|------|
| Intercept                    | 1            | 208.000        | 894.133 | .000 |
| GC.level                     | 3            | 208.000        | 76.166  | .000 |
| Group * GC.level             | 4            | 208.000        | 3.929   | .004 |
| GC.level * Speed.Factor      | 4            | 208.000        | 4.843   | .001 |
| GC.level * Inhibition.Factor | 4            | 208.000        | 2.688   | .032 |

a. Dependent Variable: G4.pc.sgdu.Mn.

**Estimates of Fixed Effects<sup>a</sup>**

| Parameter                        | B Estimate     | Std. Error | df      | t       | Sig. | 95% Confidence Interval |             |
|----------------------------------|----------------|------------|---------|---------|------|-------------------------|-------------|
|                                  |                |            |         |         |      | Lower Bound             | Upper Bound |
| Intercept                        | .489026        | .027846    | 208.000 | 17.562  | .000 | .434130                 | .543921     |
| [GC.level=1]                     | -.419048       | .039380    | 208.000 | -10.641 | .000 | -.496683                | -.341414    |
| [GC.level=2]                     | -.342475       | .039380    | 208.000 | -8.697  | .000 | -.420110                | -.264841    |
| [GC.level=3]                     | -.194579       | .039380    | 208.000 | -4.941  | .000 | -.272213                | -.116944    |
| [GC.level=4]                     | 0 <sup>b</sup> | 0          | .       | .       | .    | .                       | .           |
| [Group=1] * [GC.level=1]         | .062364        | .034273    | 208.000 | 1.820   | .070 | -.005203                | .129931     |
| [Group=1] * [GC.level=2]         | .058176        | .034273    | 208.000 | 1.697   | .091 | -.009391                | .125743     |
| [Group=1] * [GC.level=3]         | -.015993       | .034273    | 208.000 | -.467   | .641 | -.083560                | .051573     |
| [Group=1] * [GC.level=4]         | -.104546       | .034273    | 208.000 | -3.050  | .003 | -.172113                | -.036980    |
| [Group=2] * [GC.level=1]         | 0 <sup>b</sup> | 0          | .       | .       | .    | .                       | .           |
| [Group=2] * [GC.level=2]         | 0 <sup>b</sup> | 0          | .       | .       | .    | .                       | .           |
| [Group=2] * [GC.level=3]         | 0 <sup>b</sup> | 0          | .       | .       | .    | .                       | .           |
| [Group=2] * [GC.level=4]         | 0 <sup>b</sup> | 0          | .       | .       | .    | .                       | .           |
| [GC.level=1] * Speed.Factor      | .040246        | .018452    | 208.000 | 2.181   | .030 | .003869                 | .076623     |
| [GC.level=2] * Speed.Factor      | .018239        | .018452    | 208.000 | .988    | .324 | -.018138                | .054616     |
| [GC.level=3] * Speed.Factor      | .009056        | .018452    | 208.000 | .491    | .624 | -.027321                | .045433     |
| [GC.level=4] * Speed.Factor      | -.067540       | .018452    | 208.000 | -3.660  | .000 | -.103917                | -.031163    |
| [GC.level=1] * Inhibition.Factor | .033767        | .016797    | 208.000 | 2.010   | .046 | .000652                 | .066881     |
| [GC.level=2] * Inhibition.Factor | -.041653       | .016797    | 208.000 | -2.480  | .014 | -.074768                | -.008539    |
| [GC.level=3] * Inhibition.Factor | -.004020       | .016797    | 208.000 | -.239   | .811 | -.037134                | .029094     |

|                                     |         |         |         |      |      |          |         |
|-------------------------------------|---------|---------|---------|------|------|----------|---------|
| [GC.level=4] *<br>Inhibition.Factor | .011907 | .016797 | 208.000 | .709 | .479 | -.021208 | .045021 |
|-------------------------------------|---------|---------|---------|------|------|----------|---------|

- a. Dependent Variable: G4.pc.sgdu.Mn.
- b. This parameter is set to zero because it is redundant.
